# Supplementary material
Source: PubMed Central journal article supplement (PMC7516812)

## Supplementary Online Content

Master CL, Podolak OE, Ciuffreda KJ, et al. The utility of pupillary light reflex metrics as a physiologic biomarker for adolescent sport-related concussion. *JAMA Ophthalmol*. Published online September 24, 2020. doi:10.1001/jamaophthalmol.2020.3466

**eTable 1.** Pupillary Light Reflex Metrics Distinguish Healthy Controls and Acutely Concussed Athletes  $\leq 7$  days Post-Injury.

**eTable 2.** Sex-Differences in T75 Among Concussed Athletes, But Not Healthy Controls.

**eTable 3.** Influence of Exercise on Pupillary Light Reflex Metrics in Healthy Controls.

**eTable 4.** Comparison of Concussed Athletes and Healthy Controls With and Without History of Prior Concussion.

**eFigure 1.** Receiver Operating Characteristic Curves for Pupillary Light Reflex Metrics in Concussion.

**eFigure 2.** Boxplots of Distribution of Pupillary Light Reflex Metrics in Concussed Athletes Compared to Healthy Controls.

**eFigure 3.** Pupillary Light Reflex Metrics Distinguish Healthy Controls and Acutely Concussed Athletes  $\leq 7$  days Post-Injury.

**eFigure 4.** Comparison of Females to Males among Concussed Athletes and Healthy Controls.

**eFigure 5.** Influence of Exercise on Pupillary Light Reflex Metrics in Healthy Controls.

**eFigure 6.** Comparison of Concussed Athletes and Healthy Controls With and Without History of Prior Concussion.

This supplementary material has been provided by the authors to give readers additional information about their work.

eTable 1. Pupillary Light Reflex Metrics Distinguish Healthy Controls and Acutely Concussed Athletes ≤ 7 days Post-Injury.

|                                      | Concussed athletes ( <i>n</i> = 35) | Healthy controls ( <i>n</i> = 134) | Difference          |                             |
|--------------------------------------|-------------------------------------|------------------------------------|---------------------|-----------------------------|
|                                      | Mean<br>(99.44% CI)                 | Mean<br>(99.44% CI)                | Mean<br>(99.44% CI) | Bonferroni adjusted P value |
| Maximum pupil diameter (mm)          | 4.61 (4.23, 5.00)                   | 4.01 (3.82, 4.21)                  | 0.60 (0.17, 1.03)   | .001                        |
| Minimum pupil diameter (mm)          | 2.87 (2.67, 3.07)                   | 2.63 (2.53, 2.73)                  | 0.24 (0.01, 0.46)   | .03                         |
| Percent constriction (%)             | 36.91 (34.21, 39.61)                | 33.66 (32.28, 35.04)               | 3.25 (0.21, 6.28)   | .03                         |
| Latency (ms)                         | 209.29 (200.94, 217.64)             | 208.50 (204.23, 212.76)            | 0.79 (-8.58, 10.17) | 1                           |
| Average constriction velocity (mm/s) | 2.97 (2.67, 3.27)                   | 2.50 (2.34, 2.65)                  | 0.47 (0.13, 0.81)   | .001                        |
| Peak constriction velocity (mm/s)    | 4.64 (4.18, 5.10)                   | 3.91 (3.68, 4.14)                  | 0.73 (0.22, 1.24)   | < .001                      |
| Average dilation velocity (mm/s)     | 1.28 (1.15, 1.41)                   | 1.22 (1.15, 1.28)                  | 0.06 (-0.08, 0.21)  | 1                           |
| Peak dilation velocity (mm/s)        | 1.77 (1.61, 1.93)                   | 1.64 (1.56, 1.72)                  | 0.13 (-0.05, 0.31)  | .44                         |
| T75 (s)                              | 1.71 (1.44, 1.97)*                  | 1.51 (1.38, 1.64)                  | 0.20 (-0.10, 0.49)  | .53                         |

\*1 concussed athlete did not have at least valid measures for the T75 metric

eTable 2. Sex-Differences in T75 Among Concussed Athletes, But Not Healthy Controls.

|                                      | Female concussed athletes ( <i>n</i> = 55) | Male concussed athletes ( <i>n</i> = 43) | Difference           |                             |
|--------------------------------------|--------------------------------------------|------------------------------------------|----------------------|-----------------------------|
|                                      | Mean (99.44% CI)                           | Mean (99.44% CI)                         | Mean (99.44% CI)     | Bonferroni adjusted P value |
| Maximum pupil diameter (mm)          | 4.91 (4.61, 5.20)                          | 4.74 (4.41, 5.07)                        | 0.17 (-0.27, 0.61)   | 1                           |
| Minimum pupil diameter (mm)          | 2.97 (2.81, 3.13)                          | 2.95 (2.77, 3.13)                        | 0.02 (-0.22, 0.25)   | 1                           |
| Percent constriction (%)             | 39.09 (37.28, 40.90)                       | 37.14 (35.09, 39.18)                     | 1.96 (-0.78, 4.69)   | .4                          |
| Latency (ms)                         | 206.03 (199.90, 212.17)                    | 211.43 (204.49, 218.37)                  | -5.40 (-14.65, 3.86) | .91                         |
| Average constriction velocity (mm/s) | 3.11 (2.89, 3.33)                          | 3.05 (2.80, 3.29)                        | 0.06 (-0.27, 0.39)   | 1                           |
| Peak constriction velocity (mm/s)    | 4.96 (4.62, 5.30)                          | 4.78 (4.39, 5.17)                        | 0.18 (-0.34, 0.70)   | 1                           |
| Average dilation velocity (mm/s)     | 1.28 (1.18, 1.38)                          | 1.37 (1.25, 1.48)                        | -0.08 (-0.24, 0.07)  | 1                           |
| Peak dilation velocity (mm/s)        | 1.80 (1.67, 1.92)                          | 1.88 (1.74, 2.03)                        | -0.09 (-0.28, 0.10)  | 1                           |
| T75 (s)                              | 1.96 (1.75, 2.17)*                         | 1.63 (1.39, 1.86)                        | 0.33 (0.02, 0.65)    | .03                         |
|                                      |                                            |                                          |                      |                             |
|                                      | Female healthy controls ( <i>n</i> = 78)   | Male healthy controls ( <i>n</i> = 56)   | Difference           |                             |
| Maximum pupil diameter (mm)          | 3.99 (3.74, 4.24)                          | 4.05 (3.76, 4.34)                        | -0.06 (-0.44, 0.33)  | 1                           |
| Minimum pupil diameter (mm)          | 2.62 (2.49, 2.75)                          | 2.64 (2.49, 2.80)                        | -0.02 (-0.23, 0.18)  | 1                           |
| Percent constriction (%)             | 33.47 (31.66, 35.28)                       | 33.93 (31.79, 36.07)                     | -0.46 (-3.27, 2.34)  | 1                           |
| Latency (ms)                         | 207.79 (202.11, 213.48)                    | 209.48 (202.77, 216.19)                  | -1.68 (-10.48, 7.11) | 1                           |

|                                      |                   |                   |                     |     |
|--------------------------------------|-------------------|-------------------|---------------------|-----|
| Average constriction velocity (mm/s) | 2.42 (2.23, 2.62) | 2.60 (2.37, 2.84) | -0.18 (-0.49, 0.12) | .88 |
| Peak constriction velocity (mm/s)    | 3.80 (3.50, 4.09) | 4.06 (3.72, 4.41) | -0.26 (-0.72, 0.19) | .93 |
| Average dilation velocity (mm/s)     | 1.18 (1.10, 1.27) | 1.26 (1.16, 1.37) | -0.08 (-0.21, 0.05) | .87 |
| Peak dilation velocity (mm/s)        | 1.61 (1.50, 1.72) | 1.68 (1.55, 1.81) | -0.07 (-0.24, 0.10) | 1   |
| T75 (s)                              | 1.54 (1.37, 1.71) | 1.47 (1.26, 1.67) | 0.07 (-0.19, 0.34)  | 1   |

\*1 concussed athlete did not have at least 2 valid measures for the T75 metric

eTable 3. Influence of Exercise on Pupillary Light Reflex Metrics in Healthy Controls.

|                                         | Healthy controls<br>before exercise<br>(n = 78) | Healthy controls<br>after exercise<br>(n = 56) | Difference              |                                   |
|-----------------------------------------|-------------------------------------------------|------------------------------------------------|-------------------------|-----------------------------------|
|                                         | Mean<br>(99.44% CI)                             | Mean<br>(99.44% CI)                            | Mean<br>(99.44% CI)     | Bonferroni<br>adjusted<br>P value |
| Maximum pupil diameter<br>(mm)          | 4.22 (3.96, 4.48)                               | 3.81 (3.55, 4.07)                              | -0.41 (-0.77,<br>-0.05) | .02                               |
| Minimum pupil diameter<br>(mm)          | 2.71 (2.57, 2.85)                               | 2.55 (2.41, 2.69)                              | -0.16 (-0.36,<br>0.04)  | .24                               |
| Percent constriction (%)                | 34.98 (33.08,<br>36.88)                         | 32.34 (30.44,<br>34.24)                        | -2.64 (-5.33,<br>0.05)  | .06                               |
| Latency (ms)                            | 208.32 (202.18,<br>214.46)                      | 208.67 (202.53,<br>214.82)                     | 0.36 (-8.33,<br>9.04)   | 1                                 |
| Average constriction<br>velocity (mm/s) | 2.67 (2.47, 2.88)                               | 2.32 (2.12, 2.53)                              | -0.35 (-0.64,<br>-0.06) | .009                              |
| Peak constriction velocity<br>(mm/s)    | 4.17 (3.86, 4.48)                               | 3.65 (3.34, 3.95)                              | -0.52 (-0.96,<br>-0.09) | .008                              |
| Average dilation velocity<br>(mm/s)     | 1.33 (1.24, 1.41)                               | 1.11 (1.02, 1.19)                              | -0.22 (-0.34,<br>-0.10) | < .001                            |
| Peak dilation velocity<br>(mm/s)        | 1.78 (1.67, 1.89)                               | 1.50 (1.39, 1.61)                              | -0.28 (-0.44,<br>-0.13) | < .001                            |
| T75 (s)                                 | 1.47 (1.29, 1.66)                               | 1.54 (1.36, 1.73)                              | 0.07 (-0.19,<br>0.33)   | 1                                 |

eTable 4. Comparison of concussed athletes and uninjured controls with and without history of prior concussion.

|                                      | Concussed athletes with prior history of concussion<br>( <i>n</i> = 50) | Concussed athletes without prior history of concussion<br>( <i>n</i> = 48) | Difference          |                             |
|--------------------------------------|-------------------------------------------------------------------------|----------------------------------------------------------------------------|---------------------|-----------------------------|
|                                      | Mean<br>(99.44% CI)                                                     | Mean<br>(99.44% CI)                                                        | Mean<br>(99.44% CI) | Bonferroni adjusted P value |
| Maximum pupil diameter (mm)          | 4.94 (4.64, 5.25)                                                       | 4.72 (4.41, 5.03)                                                          | 0.22 (-0.21, 0.66)  | 1                           |
| Minimum pupil diameter (mm)          | 3.04 (2.87, 3.20)                                                       | 2.88 (2.71, 3.05)                                                          | 0.16 (-0.07, 0.39)  | .52                         |
| Percent constriction (%)             | 38.23 (36.30, 40.17)                                                    | 38.23 (36.26, 40.21)                                                       | 0.00 (-2.77, 2.77)  | 1                           |
| Latency (ms)                         | 212.91 (206.66, 219.16)                                                 | 203.70 (197.32, 210.08)                                                    | 9.21 (0.28, 18.14)  | .04                         |
| Average constriction velocity (mm/s) | 3.05 (2.82, 3.28)                                                       | 3.11 (2.88, 3.35)                                                          | -0.06 (-0.39, 0.27) | 1                           |
| Peak constriction velocity (mm/s)    | 4.82 (4.46, 5.18)                                                       | 4.94 (4.57, 5.31)                                                          | -0.12 (-0.63, 0.40) | 1                           |
| Average dilation velocity (mm/s)     | 1.28 (1.18, 1.39)                                                       | 1.36 (1.25, 1.47)                                                          | -0.07 (-0.22, 0.08) | 1                           |
| Peak dilation velocity (mm/s)        | 1.80 (1.66, 1.93)                                                       | 1.87 (1.74, 2.01)                                                          | -0.08 (-0.27, 0.11) | 1                           |
| T75 (s)                              | 1.88 (1.65, 2.11)                                                       | 1.74 (1.51, 1.98)*                                                         | 0.14 (-0.19, 0.46)  | 1                           |
|                                      |                                                                         |                                                                            |                     |                             |
|                                      | Healthy controls with prior history of concussion<br>( <i>n</i> = 35)   | Healthy controls without prior history of concussion<br>( <i>n</i> = 99)   | Difference          |                             |
| Maximum pupil diameter (mm)          | 4.14 (3.78, 4.51)                                                       | 3.97 (3.75, 4.19)                                                          | 0.18 (-0.25, 0.60)  | 1                           |

|                                      |                         |                         |                      |     |
|--------------------------------------|-------------------------|-------------------------|----------------------|-----|
| Minimum pupil diameter (mm)          | 2.74 (2.54, 2.93)       | 2.59 (2.48, 2.71)       | 0.14 (-0.08, 0.37)   | .7  |
| Percent constriction (%)             | 33.25 (30.55, 35.96)    | 33.80 (32.20, 35.41)    | -0.55 (-3.69, 2.60)  | 1   |
| Latency (ms)                         | 203.74 (195.35, 212.13) | 210.18 (205.19, 215.17) | -6.44 (-16.20, 3.32) | .59 |
| Average constriction velocity (mm/s) | 2.57 (2.27, 2.87)       | 2.47 (2.30, 2.65)       | 0.10 (-0.25, 0.44)   | 1   |
| Peak constriction velocity (mm/s)    | 3.98 (3.54, 4.42)       | 3.88 (3.62, 4.15)       | 0.10 (-0.42, 0.61)   | 1   |
| Average dilation velocity (mm/s)     | 1.28 (1.15, 1.41)       | 1.20 (1.12, 1.27)       | 0.08 (-0.07, 0.23)   | 1   |
| Peak dilation velocity (mm/s)        | 1.71 (1.55, 1.87)       | 1.62 (1.52, 1.71)       | 0.09 (-0.10, 0.29)   | 1   |
| T75 (s)                              | 1.49 (1.23, 1.74)       | 1.52 (1.36, 1.67)       | -0.03 (-0.33, 0.27)  | 1   |

\*1 concussed athlete did not have 3 valid measures for the T75 metric

eFigure 1. Receiver Operating Characteristic Curves for Pupillary Light Reflex Metrics in Concussion.

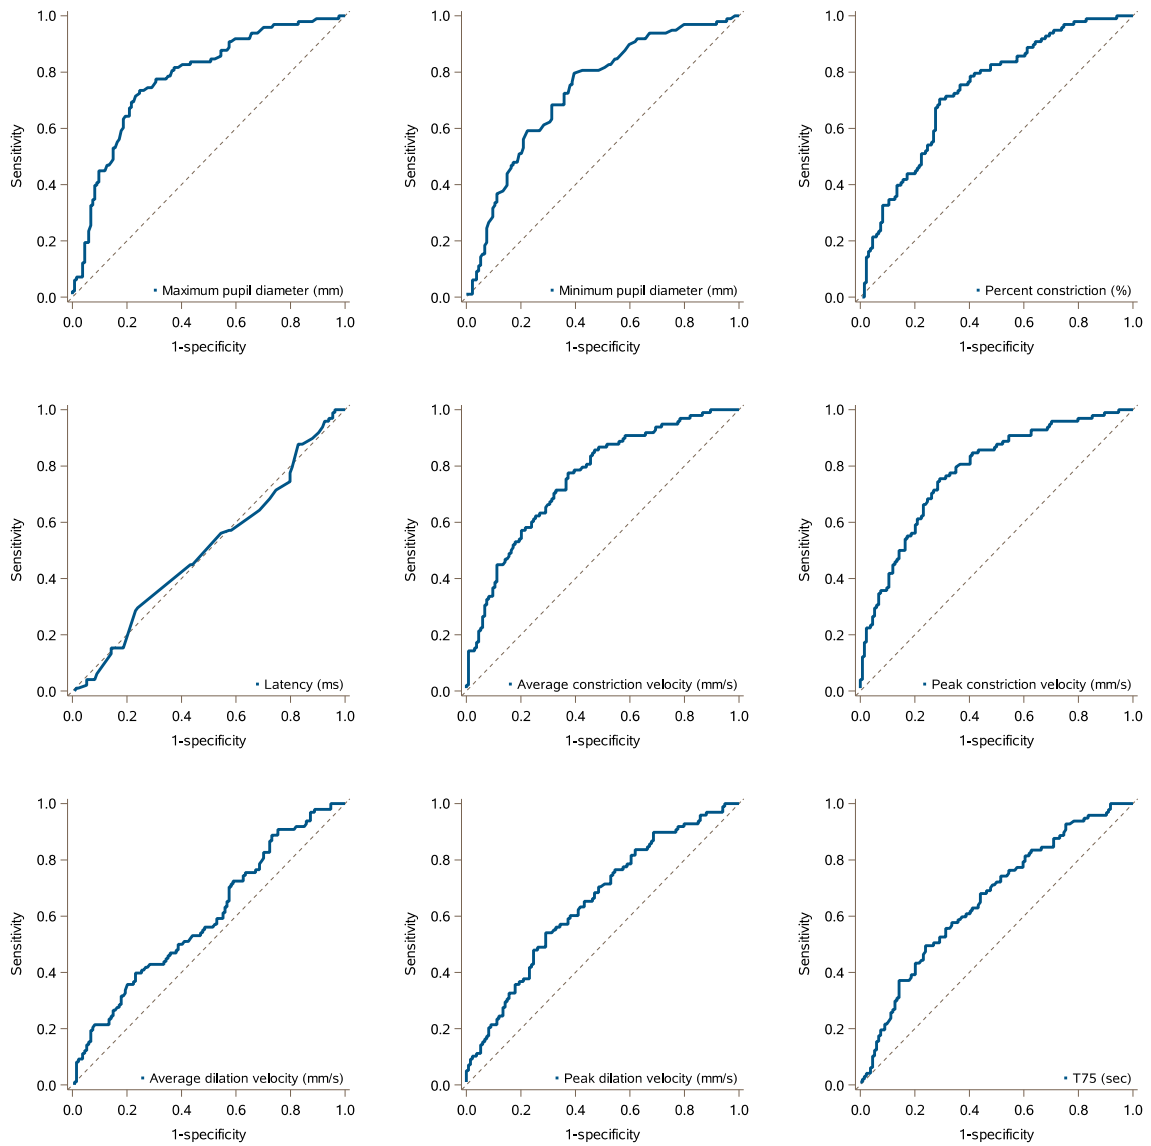



eFigure 2. Boxplots of Distribution of Pupillary Light Reflex Metrics in Concussed Athletes Compared to Healthy Controls. Top blue boxplots represent concussed athletes and bottom green boxplots represent healthy controls with diamond as mean value, white line as median value, box edges as 1<sup>st</sup> and 3<sup>rd</sup> quintile, whisker caps as minimum and maximum.

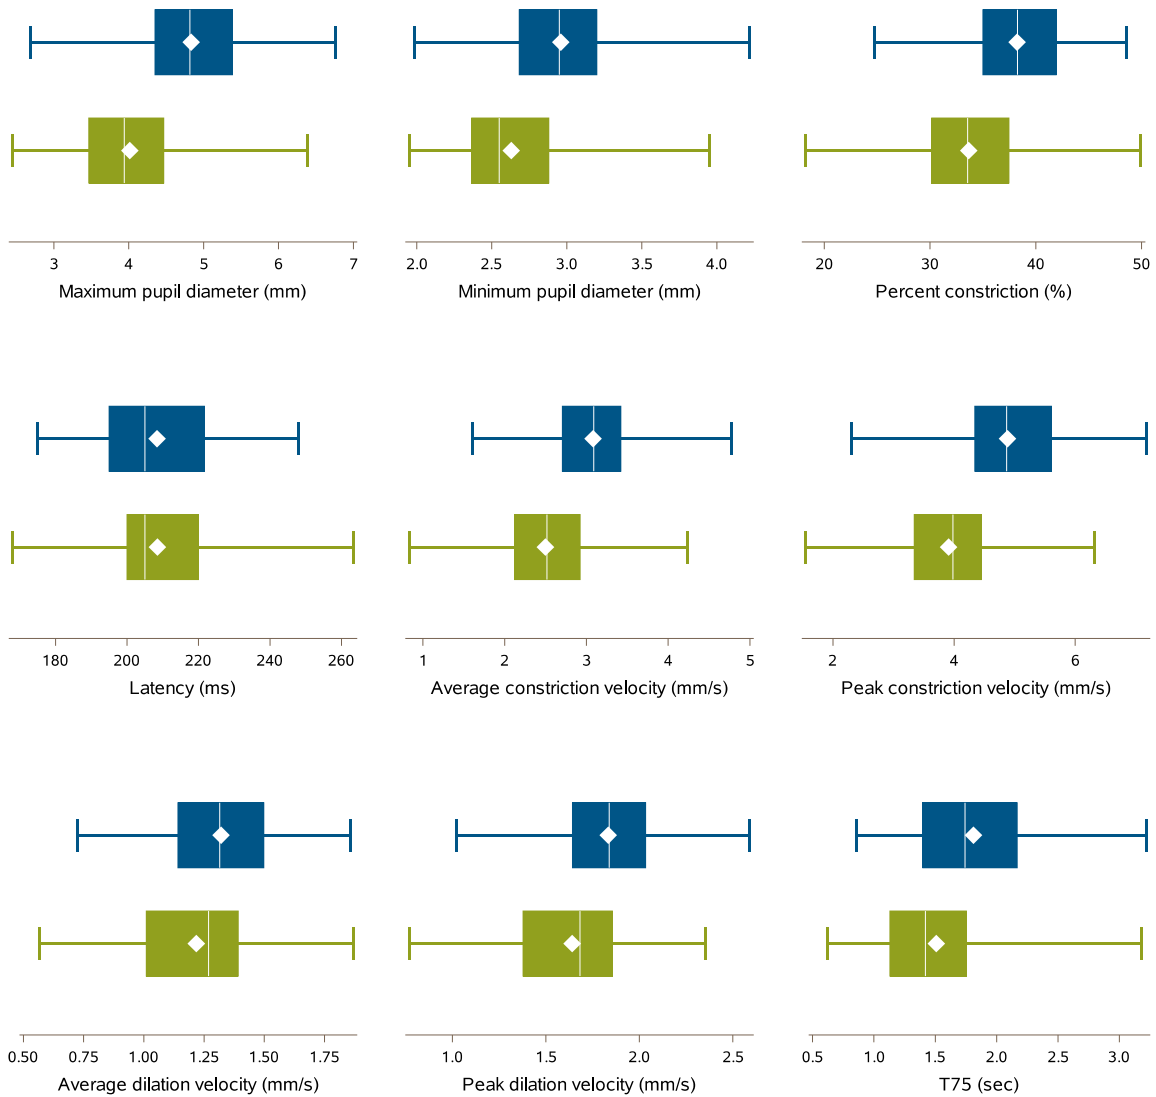

eFigure 3. Pupillary Light Reflex Metrics Distinguish Healthy Controls and Acutely Concussed Athletes ≤ 7 days Post-Injury. Top blue = cases, bottom green = controls

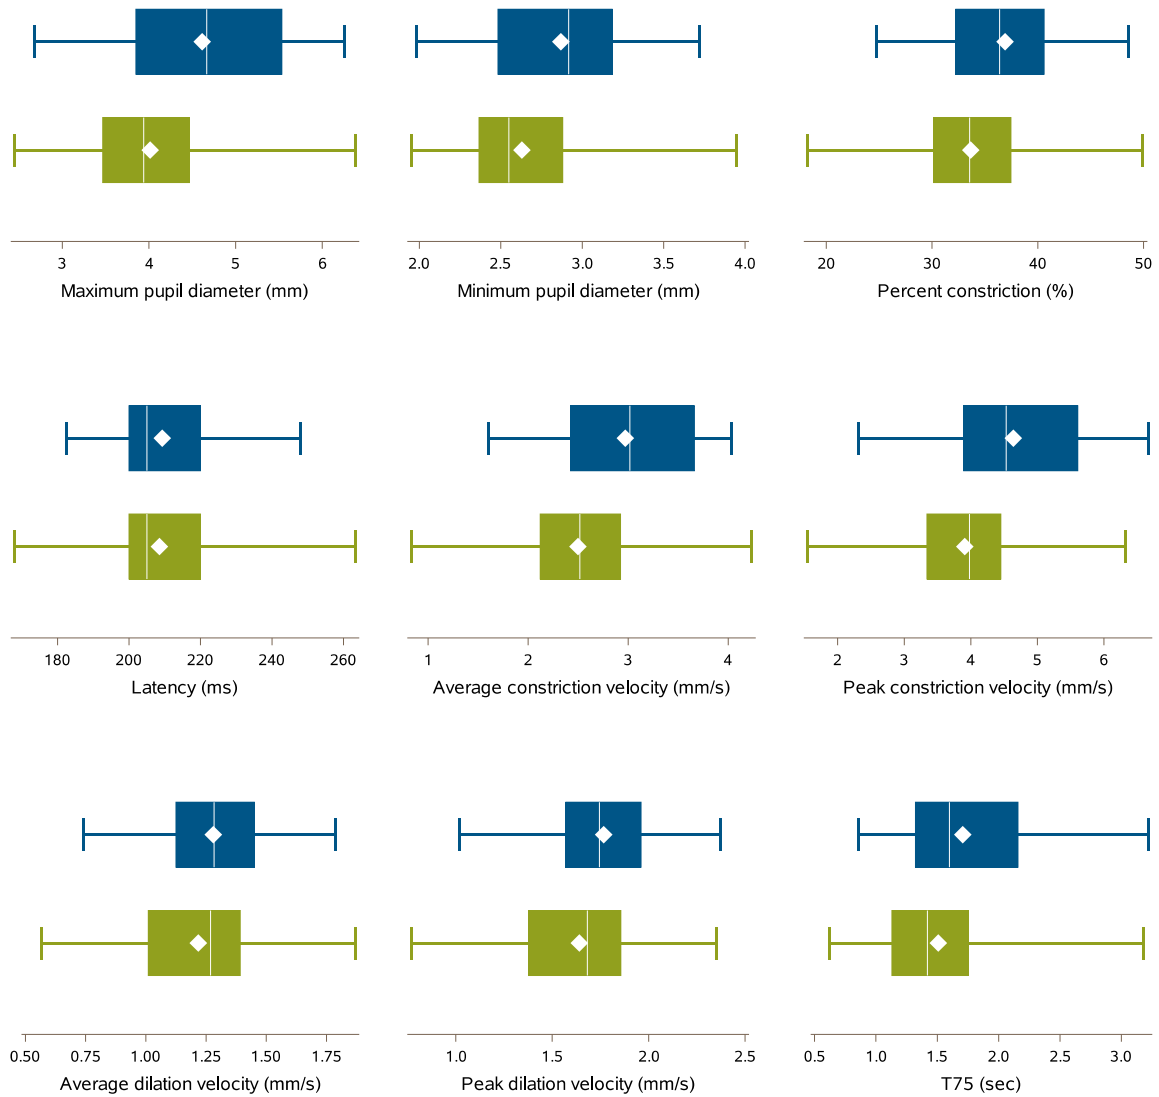

eFigure 4. Comparison of Females to Males among Concussed Athletes and Healthy Controls. Top dark blue = female cases, 2nd light blue = male cases, 3rd dark green = female controls, 4th light green = male controls

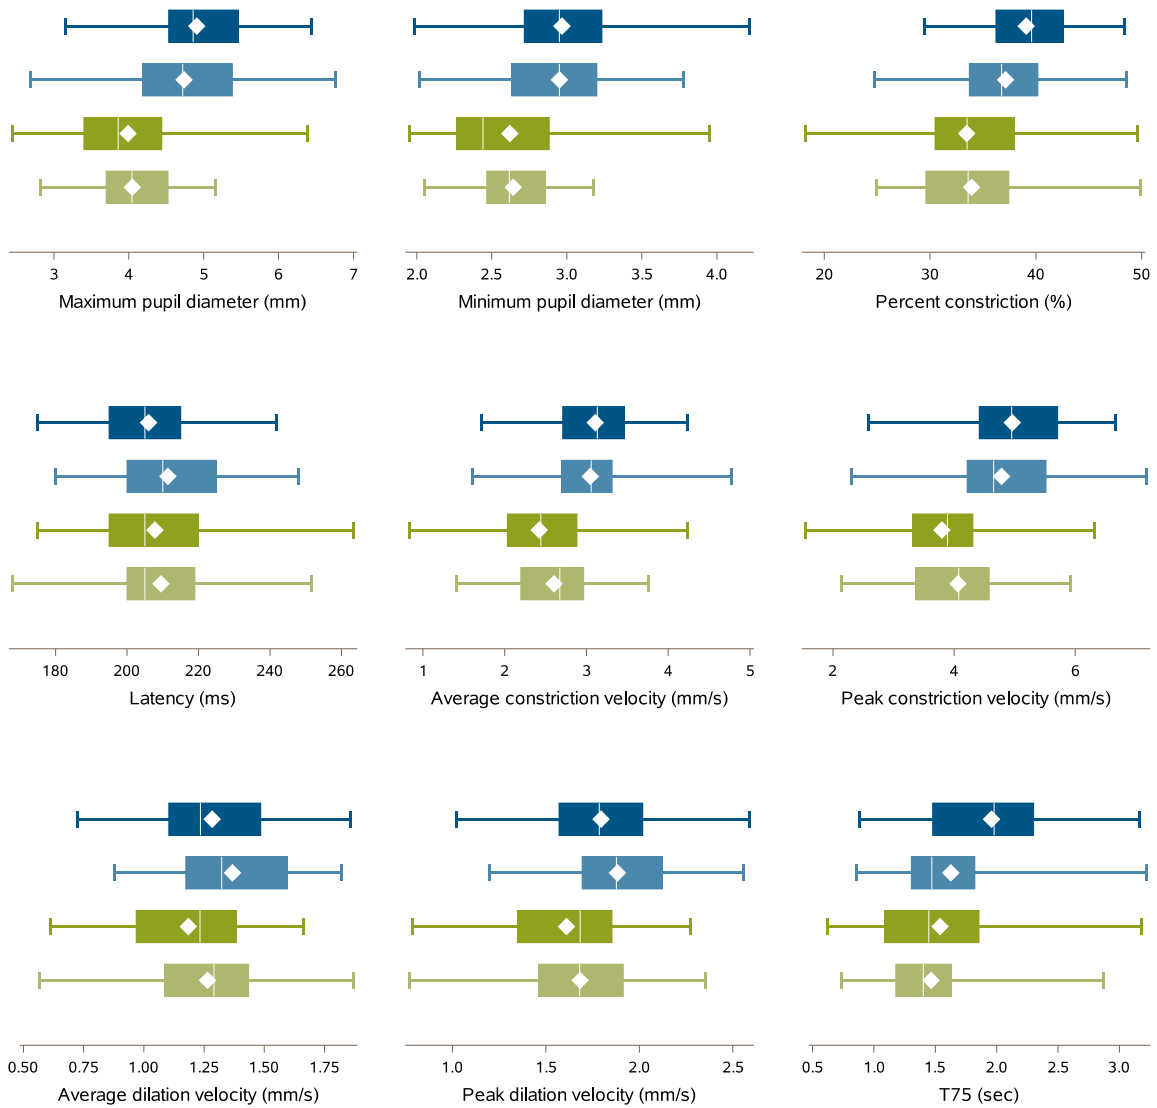

eFigure 5. Influence of Exercise on Pupillary Light Reflex Metrics in Healthy Controls. Top dark green = Healthy controls before exercise, bottom light green = Healthy controls after exercise

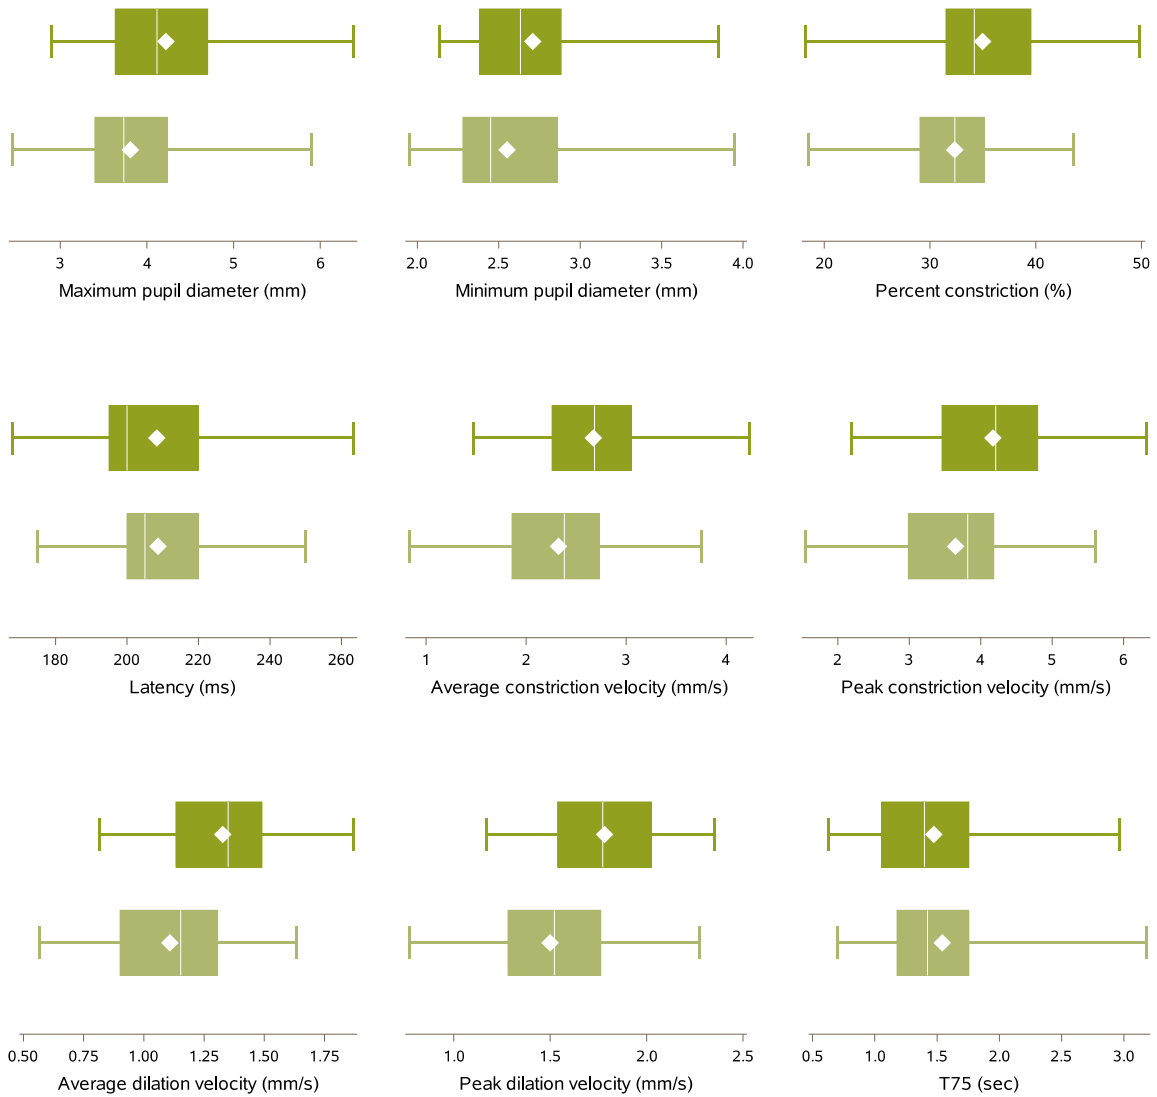

eFigure 6. Comparison of Concussed Athletes and Healthy Controls With and Without History of Prior Concussion. Top dark blue = cases with prior concussion, 2nd light blue = cases without prior concussion, 3rd dark green = controls with prior concussion, 4th light green = controls without prior concussion

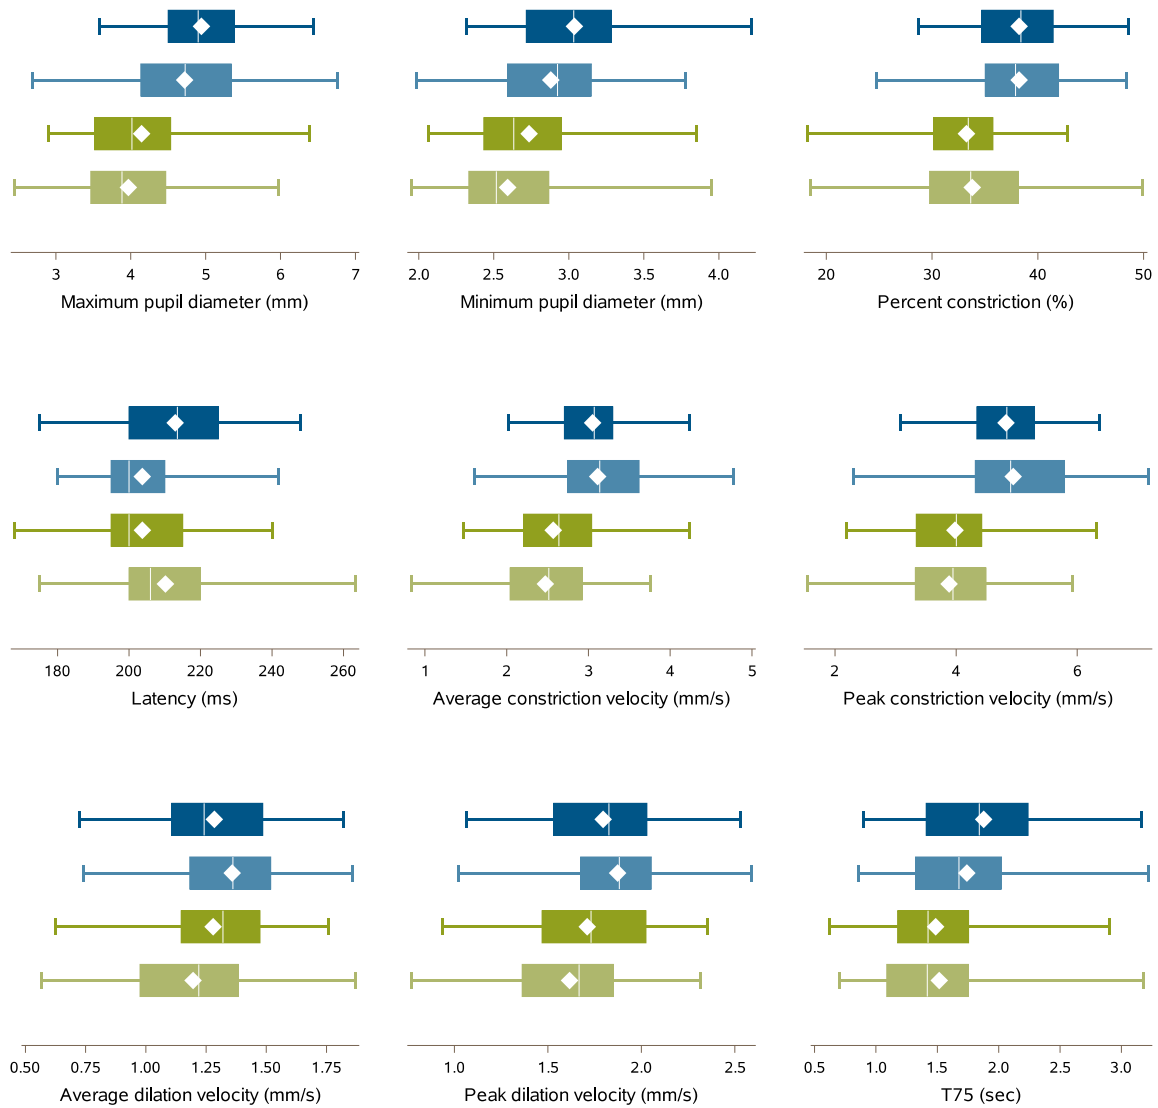

Supplement: jamaophthalmol-e203466-s001.pdf [file jamaophthalmol-e203466-s001.pdf]
